# Supplementary material for: Confirmation of novel type 1 diabetes risk loci in families
Source: PubMed Central journal article supplement — Diabetologia. 2012 Jan 26;55(4):996–1000. doi: 10.1007/s00125-012-2450-3 (PMC3296014; doi:10.1007/s00125-012-2450-3), 2012-01-26
Supplement: 125_2012_2450_MOESM1_ESM.pdf [file 125_2012_2450_MOESM1_ESM.pdf]

## Type 1 Diabetes Genetics Consortium members

**Asia-Pacific Network:** Tracey Baskerville (Mater Children's Hospital, Australia); Nines Bautista (Institute for Study on Diabetes Foundation, Philippines); Eesh Bhatia (Sanjay Gandhi Postgraduate Institute, India); Vijayalakshmi Bhatia (Sanjay Gandhi Postgraduate Institute, India); Kamaruzaman Bin Hasan (National University of Malaysia Hospital, Malaysia); Francois Bonnici (University of Cape Town, South Africa); Thomas Brodnicki (Walter & Eliza Hall Institute of Medical Research, Australia); Brian Browning (The University of Auckland, New Zealand); Fergus Cameron (Royal Children's Hospital, Australia); Katharee Chaichanwatanakul (Mahidol University, Thailand); Pik To Cheung (Queen Mary Hospital, Hong Kong); Peter Colman<sup>2,5,11,15</sup> (Walter & Eliza Hall Institute of Medical Research, Australia); Andrew Cotterill (Mater Children's Hospital, Australia); Jenny Couper (Women's and Children's Hospital, Australia); Patricia Crock (John Hunter Children's Hospital, Australia); Ric Cutfield (North Shore Hospital, New Zealand); Tim Davis (Fremantle Hospital, Australia); Paul Dixon (Diabetes Lifestyle Centre, New Zealand); Kim Donaghue (Children's Hospital at Westmead, Australia); Katrina Dowling<sup>4</sup> (Australian Red Cross Blood Service, Australia); Paul Drury (Auckland Diabetes Centre, New Zealand); Sarah Dye (Western Australia Institute for Medical Research, Australia); Shane Gellert<sup>2</sup> (The Royal Melbourne Hospital, Australia); Rohana Abdul Ghani (National University of Malaysia Hospital, Malaysia); Ristan Greer (University of Queensland, Australia); Xueyao Han (Peking University People's Hospital, China); Len Harrison (Walter & Eliza Hall Institute of Medical Research, Australia); Nick Homatopoulos<sup>4</sup> (Australian Red Cross Blood Service, Australia); Linong Ji (Peking University People's Hospital, China); Tim Jones (Princess Margaret Hospital for Children, Australia); Loke Kah Yin (Children's Medical Institute, Singapore); Nor Azmi Kamaruddin (National University of Malaysia Hospital, Malaysia); Uma Kanga (All India Institute of Medical Sciences, India); Alok Kanungo (Cuttack Diabetes Research Foundation, India); Gurvinder Kaur (All India Institute of Medical Sciences, India); Betty Kek (Children's Medical Institute, Singapore); Simon Knowles<sup>4</sup> (Australian Red Cross Blood Service, Australia); Jeremy Krebs (The Diabetes Centre, New Zealand); Neeraj Kumar (All India Institute of Medical Sciences, India); Yann-Jinn Lee<sup>7</sup> (Mackay Memorial Hospital, Taiwan); Xiaoying Li (Shanghai Jiao-Tong University, China); Supawadee Liktimaskul (Mahidol University, Thailand); Margaret Lloyd (Children's Hospital at Westmead, Australia); Amanda Loth<sup>5,10</sup> (Walter & Eliza Hall Institute of Medical Research, Australia); Anthony Louey<sup>3,4</sup> (Australian Red Cross Blood Service, Australia); Narinder Mehra<sup>8</sup> (All India Institute of Medical Sciences, India); Tony Merriman (University of Otago, New Zealand); Liu Min (Beijing Children's Hospital, China); Grant Morahan<sup>1,9,12,14,15</sup> (Western Australia Institute for Medical Research, Australia); Robert Moses (Illawarra Diabetes Services, Australia); Grant Mraz<sup>4</sup> (Australian Red Cross Blood Service, Australia); Rinki Murphy (Auckland Diabetes Centre, New Zealand); Ian Nicholson<sup>4</sup> (Australian Red Cross Blood Service, Australia); Araceli Panelo (Institute for Studies on Diabetes Foundation, Philippines); Perlita Poh<sup>2</sup> (Royal Melbourne Hospital, Australia); Gareth Price (Mater Medical Research Institute, Australia); Nirubasini Ratnam (Princess Margaret Hospital for Children, Australia); Carani Sanjeevi<sup>6</sup> (Karolinska Hospital, Sweden); Saikiran Sedimbi (Karolinska Hospital, Sweden); Shuixian Shen (Fudan University, China); Goh Siok Ying (The Children's Medical Institute, Singapore); Brian Tait<sup>3,4,5,6</sup> (Australian Red Cross Blood Service, Australia); Nikhil Tandon (All India Institute of Medical Sciences, India); Allison Thomas (Walter & Eliza Hall Institute of Medical Research, Australia); Mike Varney<sup>3,4</sup>

(Australian Red Cross Blood Service, Australia); Praewvarin Weerakulwattana (Mahidol University, Thailand); Jinny Willis (Christchurch Hospital, New Zealand)

**European Network:** Elvis Abang Akwo (Yaounde Central Hospital, Cameroon); Lotte Albret<sup>5,10</sup> (Hagedorn Research Institute and Steno Diabetes Center, Denmark); Francisco Ampudia-Blasco (Clinic University Hospital Valencia, Spain); Jesus Argente (Hospital Infantil Universitario Nino Jesus, Spain); Magdalena Avbelj (University Children's Hospital, Slovenia); Gulja Babadjanova (Moscow State Medical University, Russia); Klaus Badenhoop<sup>14</sup> (University Clinic Frankfurt/Main, Germany); Tadej Battelino (University Children's Hospital, Slovenia); Georg Beilhack<sup>14</sup> (University of Ulm, Germany); Regine Bergholdt (Hagedorn Research Institute and Steno Diabetes Center, Denmark); Polly Bingley<sup>2,5</sup> (University of Bristol, United Kingdom); Bernhard Boehm<sup>4,5,14</sup> (Ulm University, Germany); Jo Bolidson<sup>2</sup> (University of Bristol, United Kingdom); Kerstin Brismar (Karolinska Hospital, Sweden); Caroline Brorsson<sup>14</sup> (Hagedorn Research Institute and Steno Diabetes Center, Denmark); Joyce Carlson<sup>3,5</sup> (University Hospital MAS, Sweden); Luis Castano (Hospital de Cruces, Spain); Kyla Chandler<sup>2</sup> (University of Bristol, United Kingdom); Valentino Cherubini (Salesi Hospital, Italy); Ondrej Cinek (Motol University Hospital, Czech Republic); Elisa Cipponeri (University Campus Bio-Medico, Italy); Raquel Corripio Collado (Consorti Sanitari Parc Tauli, Spain); Alberto de Leiva (Hospital Sant Pau, Spain); Iveta Dzivite (University Children's Hospital, Latvia); Ana Fagulha (University Hospital, Portugal); Merce Fernandez Balcells (Hospital Trueta, Spain); Beatriz Garcia Cuartero (Hospital Severo Ochoa, Spain); Concepcion Garcia Lacalle (Hospital Severo Ochoa, Spain); Cristian Guja (Institute of Diabetes, Nutrition & Metabolic Diseases, Romania); Pilar Gutiérrez (Hospital Universitario de Getafe, Spain); Alona Hamou (Schneider Children's Medical Center of Israel, Israel); Erifili Hatziagelaki (University of Athens, Greece); Simon Heath<sup>7</sup> (Centre National de Genotypage, France); Kaire Heilman (Tartu University Children's Hospital, Estonia); Wolfgang Helmberg<sup>5,7</sup> (Medical University Graz, Austria); Orna Hermon (Schneider Children's Medical Center of Israel, Israel); Marta Hernandez (Hospital Universitari Arnau de Vilanova and Hospital Universitario de Canarias, Spain); Iris Holzheu<sup>4</sup> (Ulm University, Germany); Nora Hosszufalusi (Semmelweis University, Hungary); Jorma Ilonen (University of Turku, Finland); Constantin Ionescu-Tirgoviste (Institute of Diabetes, Romania); Jesper Johannesen (Steno Diabetes Center, Denmark); Cecile Julier<sup>1,9,12,14</sup> (Centre National de Genotypage, France); Heinrich Kahles<sup>14</sup> (Klinikum der J.W. Goethe-Universität, Germany); Ida Kinalska (Medical University of Bialystok, Poland); Mikael Knip (University of Helsinki, Finland); Ingrid Kockum<sup>7,14</sup> (Karolinska Hospital, Sweden); Eija Kojo (University of Helsinki, Finland); Olga Kordonouri (Children's Hospital auf der Bult, Germany); Adam Kretowski (Medical University of Bialystok, Poland); Dora Krikovszky (Semmelweis University, Hungary); Angelika Kurkhaus<sup>4</sup> (Ulm University, Germany); Madiusz Kuzmicki (Medical University of Bialystok, Poland); Eva Lavant<sup>3</sup> (University Hospital MAS, Sweden); Anna Long<sup>2</sup> (University of Bristol, United Kingdom); Johnny Ludvigsson (University Hospital, Sweden); Laszlo Madacsy (Semmelweis University, Hungary); Katarzyna Maliszewska (Medical University of Bialystok, Poland); Mara Marga (P. Stradins University Hospital, Latvia); Marissa Penna Martinez (University Clinic Frankfurt/Main, Germany); Didac Mauricio<sup>6</sup> (Hospital Universitari Arnau de Vilanova and Hospital Sant Pau, Spain); Gertrud Mazurkiewicz<sup>4</sup> (Ulm University, Germany); Jorn Nerup<sup>1,15</sup> (Steno Diabetes Center, Denmark); Antanas Norkus (Institute of Endocrinology of Kaunas University of Medicine, Lithuania); Francisco Javier Novoa Mogollon (Hospital Universitario Insular, Spain); Anna Okruszko (Medical University of Bialystok, Poland); Chiara Pettinari (Salesi Hospital, Italy); Moshe Phillip (Schneider Children's Medical Center of Israel, Israel); Valdis Pirags

(P. Stradins University Hospital, Latvia); Flemming Pociot<sup>1,11,12,14,15</sup> (Hagedorn Research Institute and Steno Diabetes Center, Denmark); Paolo Pozzilli (University Campus Bio-Medico, Italy); Radu Racasan (University Clinic Frankfurt/Main, Germany); Klemens Raile (Virchow Clinic Charité Berlin, Germany); Rebecca Rappner<sup>3</sup> (University Hospital MAS, Sweden); Maria Jesus Rodriguez Troyano (University Hospital of Las Palmas de Gran Canaria, Spain); Bart O. Roep (Leiden University Medical Center, Netherlands); Saba Rokni<sup>2</sup> (Southmead Hospital, United Kingdom); Silke Rosinger<sup>4</sup> (Ulm University, Germany); Oscar Rubio-Cabezas (Hospital Infantil Universitario Nino Jesus, Spain); Christa Ruckgaber<sup>4</sup> (Ulm University, Germany); Ilhan Satman (Istanbul University, Turkey); Edith Schober (University Children's Hospital, Austria); Jochen Seufert (Medizinische Poliklinik der Universität, Germany); Rosi Sing<sup>4</sup> (Ulm University, Germany); Jan Skrha (Faculty of Medicine 1, Czech Republic); Eugene Sobngwi (Central National Obesity Centre and Hospital of Diabetes Endocrine, Cameroon); Michelle Somerville<sup>2</sup> (University of Bristol, United Kingdom); Giatgen Spinaz<sup>8</sup> (University Hospital, Switzerland); Zdenek Sumnik (University Hospital Motol, Czech Republic); Vallo Tilmann (Tartu University Children's Hospital, Estonia); Dag Undlien<sup>6</sup> (University of Oslo, Norway); Vaidotas Urbanavicius (Vilnius University Hospital, Lithuania); Bart Van der Auwera<sup>8</sup> (Vrije Universiteit Brussel, Belgium); Federico Vasquez San Miguel (Hospital de Cruces, Spain); Andriani Vazeo-Gerasimidi (Diabetes Center P&A Kyriakou Children's Hospital, Greece); Dzilda Velickiene (Institute of Endocrinology of Kaunas University of Medicine, Lithuania); Ana Wagner<sup>5,10</sup> (University Hospital of Las Palmas de Gran Canaria, Spain, and Steno Diabetes Center, Denmark); Markus Walter (Diabetes Research Institute, Germany); Alistair Williams<sup>2</sup> (University of Bristol, United Kingdom); Anette Ziegler (Diabetes Research Institute, Germany)

**North American Network:** Matthew Agleham<sup>3</sup> (Roche Molecular Systems, United States); Alan Aldrich<sup>5,10</sup> (Benaroya Research Institute, United States); Ramin Alemzadeh (Medical College of Wisconsin, United States); Chester Alper (Immune Disease Institute, United States); Theresa Aly (Barbara Davis Center for Childhood Diabetes, United States); Dimitris Anastassiou (Columbia University, United States); Shaily Arora<sup>3</sup> (Children's Hospital Oakland Research Institute, United States); Audrey Austin (Children's National Medical Center, United States); Dorothy Becker (Rangos Research Center, United States); Christophe Benoist (Joslin Diabetes Center, United States); Nouredine Berka<sup>6</sup> (Calgary Laboratory Services, Canada); Suruchi Bhatia (Oakland Children's Hospital Research Center, United States); Persia Bonella<sup>3</sup> (Roche Molecular Systems, United States); Nunzio Bottini<sup>14</sup> (University of Southern California, United States); Sean Boyle<sup>3</sup> (Roche Molecular Systems, United States); Jeanah Braden (Children's Hospital Oakland Research Institute, United States); Barry Brady (Arkansas Children's Hospital, United States); Wendy Brickman (Children's Memorial Hospital, United States); Richard Christensen (Humphreys Diabetes Center, United States); Patrick Concannon<sup>1,9,12,14</sup> (University of Virginia, United States); Robert Couch (University of Alberta, Canada); Debra Counts (University of Maryland, United States); Jill Crandall (Albert Einstein College of Medicine, United States); Mark Daniels (Children's Hospital of Orange County, United States); Larry Dolan (Cincinnati Children's Hospital Medical Center, United States); David Donaldson (Utah Diabetes Center, United States); Alessandro Doria<sup>6</sup> (Joslin Diabetes Center, United States); George Eisenbarth<sup>2,5,13,14</sup> (Barbara Davis Center for Childhood Diabetes, United States); James Elder (University of Michigan, United States); Rita El-Hajj (Main Line Health Heart Center, United States); Henry Erlich<sup>1,3,5,13,14</sup> (Roche Molecular Systems, United States); Pamela Fain (Barbara Davis Center for Childhood Diabetes, United States); Anna Lisa Fear<sup>3</sup> (Children's Hospital Oakland Research Institute, United States); Robert Ferry (The

University of Texas Health Science Center at San Antonio, United States); Rosanna Fiallo-Scharer (Barbara Davis Center for Childhood Diabetes, United States); Daniel Geraghty (Fred Hutchinson Cancer Research Center, United States); Soumitra Ghosh<sup>6</sup> (Medical College of Wisconsin, United States); Steven Gitelman (University of California at San Francisco, United States); Michelle Godwin<sup>4</sup> (Fred Hutchinson Cancer Research Center, United States); Robin Goland (Naomi Berrie Diabetes Center, United States); Nathan Goodman<sup>7</sup> (Institute for Systems Biology, United States); Greg Goodwin (Joslin Diabetes Center, United States); Jenna Gravely<sup>4</sup> (Fred Hutchinson Cancer Research Center, United States); Carla Greenbaum<sup>8,11,15</sup> (Benaroya Research Institute, United States); Chelsea Gudgeon<sup>4</sup> (Fred Hutchinson Cancer Research Center, United States); Fred Gunville (Billings Clinic, United States); William Hagopian<sup>11</sup> (University of Washington, United States); Hakon Hakonarson (Children's Hospital of Philadelphia, United States); John Hansen<sup>4,5</sup> (Fred Hutchinson Cancer Research Center, United States); Kimberly Harrington<sup>4</sup> (Fred Hutchinson Cancer Research Center, United States); Jeanne Hassing (Sacred Heart, United States); Wendy Hilliker<sup>4</sup> (Fred Hutchinson Cancer Research Center, United States); Robert Hoffman (Ohio State University, United States); Erin Hulbert (Institute for Systems Biology, United States); Roberto Izquierdo (SUNY Upstate Medical University, United States); Nicholas Jospe (University of Rochester, United States); Kevin Kaiserman (Children's Hospital Los Angeles, United States); Francine Kaufman (Children's Hospital Los Angeles, United States); Samuel Kim<sup>3</sup> (Roche Molecular Systems, United States); Erin Kloos<sup>4</sup> (Fred Hutchinson Cancer Research Center, United States); Roman Kosoy (Benaroya Research Institute, United States); James Lane (University of Nebraska, United States); Julie Lane<sup>3</sup> (Children's Hospital Oakland Research Institute, United States); Jean Lawrence (Kaiser Permanente, United States); Claesa Levetan (Main Line Health Heart Center, United States); Phil Levin (MODEL Clinical Research, United States); Rebecca Lipton (University of Chicago, United States); John Lonsdale (Human Biological Data Interchange, United States); Victoria Magnuson (Children's Hospital of Wisconsin, United States); Jennifer Marks (University of Miami, United States); Beth Mayer-Davis (University of South Carolina, United States); Robert McEvoy (Children's Hospital of Minnesota, United States); Richard McIndoe<sup>7</sup> (Medical College of Georgia, United States); Lesley Merkle<sup>4</sup> (Fred Hutchinson Cancer Research Center, United States); Daniel Metzger (BC Children's Hospital, Canada); Dongmei Miao<sup>2</sup> (Barbara Davis Center for Childhood Diabetes, United States); Eric Mickelson<sup>4</sup> (Fred Hutchinson Cancer Research Center, United States); Priscilla Moonsamy<sup>3</sup> (Roche Molecular Systems, United States); Wayne Moore (Children's Mercy Hospital, United States); Antoinette Moran (University of Minnesota, United States); Janelle Noble<sup>3,5,13,14</sup> (Children's Hospital Oakland Research Institute, United States); Gary Olsem<sup>4</sup> (Fred Hutchinson Cancer Research Center, United States); Suna Onengut-Gumuscu<sup>14</sup> (University of Virginia, United States); Tihamer Orban (Joslin Diabetes Center, United States); Craig Orłowski (University of Rochester Medical Center, United States); Andrew Paterson (University of Toronto, Canada); Massimo Pietropaolo (University of Michigan Medical School, United States); Catherine Pihoker (Children's Hospital and Regional Medical Center, United States); Constantin Polychronakos<sup>11,14</sup> (McGill University Health Center, Canada); Jeff Post<sup>3</sup> (Roche Molecular Systems, United States); Daniel Postellon (Helen DeVos Children's Hospital, United States); Alberto Pugliese<sup>9,14</sup> (University of Miami, United States); HuiQi Qu<sup>14</sup> (Montreal Children's Hospital, Canada); Teresa Quattrin (Women and Children's Hospital of Buffalo, United States); Mark Rappaport (Pediatric Endocrine Associates, United States); Philip Raskin (University of Texas Southwestern Medical Center, United States); Heather Risbeck<sup>4</sup> (Fred Hutchinson Cancer Research Center, United States); Henry Rodriguez (Riley Hospital for Children, United States); Luisa Rodriguez (Baylor College of

Medicine, United States); Michelle Rogers<sup>4</sup> (Fred Hutchinson Cancer Research Center, United States); Leticia Rubalcava (Children's Hospital Oakland Research Institute, United States); Bill Russell (Vanderbilt University, United States); Desmond Schatz (University of Florida, United States); Carla Scott (University of Texas Health Science Center at San Antonio, United States); Jin-Xiong She<sup>14</sup> (Medical College of Georgia, United States); Heather Shilling (Benaroya Research Institute, United States); Dorothy Shulman (University of South Florida, United States); Leslie Soyka (University of Massachusetts Memorial Center, United States); Phyllis Speiser (Schneider Children's Hospital, United States); Harold Starkman (Atlantic Health System, United States); Andrea Steck<sup>14</sup> (Barbara Davis Center for Childhood Diabetes, United States); Sarah Stender (University of Tennessee, United States); Lorraine Stratton (University of Arizona, United States); Daniel Sur<sup>3</sup> (Roche Molecular Systems, United States); Shayne Taback (University of Manitoba, United States); Kathryn Thrailkill (Arkansas Children's Hospital, United States); Ellen Toth (University of Alberta, Canada); Patricia Trymbiski (Doylestown Hospital, United States); Eva Tsalikian (University of Iowa, United States); Katherine Vertchnik<sup>4</sup> (Fred Hutchinson Cancer Research Center, United States); Jack Wahlen (Endocrine Research Specialists, United States); Xujing Wang (Max McGee National Research Center of Juvenile Diabetes, United States); Sandra Weber (Greenville Hospital System, United States); Diane Wherrett (Hospital for Sick Children, Canada); Steven Willi (Children's Hospital of Philadelphia, United States); Darrell Wilson (Stanford University, United States); Jerry Youkey (Greenville Hospital System, United States); Neal Young (National Institutes of Health, United States); Liping Yu<sup>2</sup> (Barbara Davis Center for Childhood Diabetes, United States); Lue Ping Zhao (Fred Hutchinson Cancer Research Institute, United States); Donald Zimmerman (Children's Memorial Hospital, United States)

**United Kingdom Network:** Ellen Adlem<sup>4</sup> (University of Cambridge, United Kingdom); James Allen<sup>4</sup> (University of Cambridge, United Kingdom); Jeffrey Barrett (WT Sanger Institute, United Kingdom); Judy Brown<sup>4</sup> (University of Cambridge, United Kingdom); Oliver Burren<sup>4</sup> (University of Cambridge, United Kingdom); Pamela Clarke<sup>4</sup> (University of Cambridge, United Kingdom); David Clayton<sup>4</sup> (University of Cambridge, United Kingdom); Gillian Coleman<sup>4</sup> (University of Cambridge, United Kingdom); Jason Cooper<sup>4</sup> (University of Cambridge, United Kingdom); Francesco Cucca<sup>6</sup> (University of Sassari, United Kingdom); Lucy Davison (University of Cambridge, United Kingdom); Kate Downes (University of Cambridge, United Kingdom); Simon Duley<sup>4</sup> (University of Cambridge, United Kingdom); David Dunger<sup>11</sup> (University of Cambridge, United Kingdom); Laura Esposito (University of Cambridge, United Kingdom); Vin Everett<sup>4</sup> (University of Cambridge, United Kingdom); Sarah Field (University of Cambridge, United Kingdom); Jason Hafler (University of Cambridge, United Kingdom); Matthew Hardy<sup>4</sup> (University of Cambridge, United Kingdom); Deborah Harrison<sup>4</sup> (University of Cambridge, United Kingdom); Inge Harrison<sup>4</sup> (University of Cambridge, United Kingdom); Steve Hawkins<sup>4</sup> (University of Cambridge, United Kingdom); Barry Healy<sup>4</sup> (University of Cambridge, United Kingdom); Simon Hood<sup>4</sup> (University of Cambridge, United Kingdom); Simon Howell<sup>8</sup> (King's College, United Kingdom); Joanna Howson (University of Cambridge, United Kingdom); Meeta Maisuria<sup>4</sup> (University of Cambridge, United Kingdom); William Meadows<sup>4</sup> (University of Cambridge, United Kingdom); Trupti Mistry<sup>4</sup> (University of Cambridge, United Kingdom); Sergey Nezhenstsev (University of Cambridge, United Kingdom); Sarah Nutland<sup>4,5</sup> (University of Cambridge, United Kingdom); Nigel Ovington<sup>4</sup> (University of Cambridge, United Kingdom); Vincent Plagnol (University of Cambridge, United Kingdom); Dan Rainbow (University of Cambridge, United Kingdom); Kara Rainbow (University of Cambridge, United Kingdom); Srilakshmi

Raj (University of Cambridge, United Kingdom); Helen Schuilenburg<sup>4</sup> (University of Cambridge, United Kingdom); Anna Simpson<sup>4</sup> (University of Cambridge, United Kingdom); Luc Smink<sup>7</sup> (University of Cambridge, United Kingdom); Debbie Smyth (University of Cambridge, United Kingdom); Helen Stevens<sup>4</sup> (University of Cambridge, United Kingdom); Niall Taylor<sup>4</sup> (University of Cambridge, United Kingdom); John Todd<sup>1,4,12,14,15</sup> (University of Cambridge, United Kingdom); Jaakko Tuomilehto (National Public Health Institute, Finland); Neil Walker<sup>4,5</sup> (University of Cambridge, United Kingdom); Linda Wicker (University of Cambridge, United Kingdom); Barry Widmer<sup>4</sup> (University of Cambridge, United Kingdom); Mark Wilson<sup>4</sup> (University of Cambridge, United Kingdom); Heather Withers<sup>5,10</sup> (University of Cambridge, United Kingdom); Jennie Yang (University of Cambridge, United Kingdom)

**Coordinating Center:** Mark Brown (Wake Forest University Health Sciences, United States); Wei-Min Chen (University of Virginia, United States); Arnetta Crews (Wake Forest University Health Sciences, United States); Jason Griffin (Wake Forest University Health Sciences, United States); Mark Hall<sup>8</sup> (Wake Forest University Health Sciences, United States); Teresa Harnish (Wake Forest University Health Sciences, United States); John Hepler (Wake Forest University Health Sciences, United States); Joan Hilner<sup>5,8,10</sup> (Wake Forest University Health Sciences, United States); Nancy King<sup>8</sup> (Wake Forest University Health Sciences, United States); Kurt Lohman (Wake Forest University Health Sciences, United States); Lingyi Lu (Wake Forest University Health Sciences, United States); Josyf Mychalecky<sup>5,7</sup> (University of Virginia, United States); Jay Nail (Wake Forest University Health Sciences, United States); Letitia Perdue<sup>5,10</sup> (Wake Forest University Health Sciences, United States); June Pierce (Wake Forest University Health Sciences, United States); David Reboussin<sup>5,6</sup> (Wake Forest University Health Sciences, United States); Stephen Rich<sup>1,12,14</sup> (University of Virginia, United States); Scott Rushing (Wake Forest University Health Sciences, United States); Michele Sale (University of Virginia, United States); Elizabeth Sides<sup>5,10</sup> (Wake Forest University Health Sciences, United States); Beverly Snively<sup>11</sup> (Wake Forest University Health Sciences, United States); Hoa Teuschler (Wake Forest University Health Sciences, United States); Goodrich Theil (Wake Forest University Health Sciences, United States); Lynne Wagenknecht (Wake Forest University Health Sciences, United States); Dustin Williams (Wake Forest University Health Sciences, United States)

**Project Office:** Beena Akolkar<sup>1,5,6,9,12</sup> (National Institute of Diabetes and Digestive and Kidney Diseases/National Institutes of Health, United States); Catherine McKeon<sup>8</sup> (National Institute of Diabetes and Digestive and Kidney Diseases/National Institutes of Health, United States); Concepcion Nierras<sup>9</sup> (Juvenile Diabetes Research Foundation International, United States); Elizabeth Thomson<sup>8</sup> (National Human Genome Research Institute/National Institutes of Health, United States)

**Other Contributors:** David Altshuler (Whitehead Institute for Biomed Research, United States); Kinman Au<sup>14</sup> (Medical College of Georgia, United States); Steve Bain<sup>14</sup> (University of Wales Swansea, United Kingdom); Lisa Barcellos<sup>13</sup> (University of California at Berkeley, United States); Sandra Barral<sup>13</sup> (Rockefeller University, United States); Tim Becker<sup>13</sup> (Karolinska Institutet, Sweden); Farren Briggs<sup>13</sup> (University of California at Berkeley, United States); Paola Bronson<sup>13</sup> (University of California at Berkeley, United States); Mark Daly<sup>7,13</sup> (Massachusetts General Hospital, United States); Paul de Bakker<sup>13</sup> (Massachusetts General Hospital, United States); Panos Deloukas<sup>13</sup> (Wellcome Trust Sanger Institute, United Kingdom); Bernie Devlin<sup>13</sup> (University of Pittsburgh, United States)

States); Morten Chrisoph Eike<sup>13,14</sup> (Institute of Immunology, Norway); Leigh Field<sup>14</sup> (University of British Columbia, Canada); Stacey Gabriel (Broad Institute of MIT and Harvard, United States); Nikhil Garge<sup>14</sup> (Medical College of Georgia, United States); Silvana Gaudieri<sup>13</sup> (Murdoch University, Australia); Ben Goldstein<sup>13</sup> (University of California at Berkeley, United States); Clara Gorodezky (INDRE SSA, Mexico); Sara Hamon<sup>13</sup> (Rockefeller University, United States); Chungsheng He<sup>13</sup> (Rockefeller University, United States); Joanna Howson<sup>4,13,14</sup> (University of Cambridge, United Kingdom); Keith Humphreys<sup>13</sup> (Karolinska Institutet, Sweden); Ian James<sup>13</sup> (Murdoch University, Australia); Mark Lathrop<sup>13</sup> (Centre National de Genotypage, France); Benedicte Alexandra Lie<sup>13</sup> (University of Oslo, Norway); Dawei Li<sup>13</sup> (Rockefeller University, United States); Steven Mack<sup>13</sup> (Roche Molecular Systems, United States); Ralph McGinnis<sup>13</sup> (Wellcome Trust Sanger Institute, United Kingdom); Elizabeth McKinnon<sup>13</sup> (Murdoch University, Australia); William McLaren<sup>13</sup> (Wellcome Trust Sanger Institute, United Kingdom); David Nolan<sup>13</sup> (Murdoch University, Australia); Marita Olsson<sup>13</sup> (Karolinska Institutet, Sweden); Jurg Ott<sup>13</sup> (Rockefeller University, United States); David Owerbach (Baylor College of Medicine, United States); Chris Patterson<sup>14</sup> (Queen's University Belfast, United Kingdom); Robert Podolsky<sup>14</sup> (Medical College of Georgia, United States); Patricia Ramsay<sup>13</sup> (University of California at Berkeley, United States); Venkatesh Ranganath<sup>13</sup> (Wellcome Trust Sanger Institute, United Kingdom); Neil Risch<sup>13</sup> (University of California at San Francisco, United States); Kjersti Skjold Ronningen<sup>14</sup> (Norwegian Institute of Public Health, Norway); Xiarong Shao<sup>13</sup> (University of California at Berkeley, United States); Richard Single<sup>13</sup> (University of Vermont, United States); Michael Steffes<sup>5</sup> (University of Minnesota, United States); Glenys Thomson<sup>13</sup> (University of California at Berkeley, United States); Ana Maria Valdes<sup>5,13</sup> (Lartech, Italy); Claire Vandiedonck<sup>13</sup> (Wellcome Trust Centre for Human Genetics, United Kingdom); Pam Whittaker (Wellcome Trust Sanger Institute, United Kingdom); Qingrun Zhang<sup>13</sup> (Beijing Institute of Genomics, China)

**Study Roles:** <sup>1</sup>Steering Committee, <sup>2</sup>Autoantibody Laboratory, <sup>3</sup>HLA Genotyping Laboratory, <sup>4</sup>Network DNA Repository, <sup>5</sup>Quality Control Committee, <sup>6</sup>Access Committee, <sup>7</sup>Bioinformatics Committee, <sup>8</sup>Ethical Legal and Social Issues Committee, <sup>9</sup>Molecular Technology Committee, <sup>10</sup>Network Coordinators Committee, <sup>11</sup>Phenotyping and Recruitment Committee, <sup>12</sup>Publications and Presentations Committee, <sup>13</sup>MHC Fine Mapping Working Group, <sup>14</sup>Rapid Response Working Group, <sup>15</sup>Network Principal Investigator.
