# Supplementary material for: Confirmation of novel type 1 diabetes risk loci in families
Source: PubMed Central journal article supplement — Diabetologia. 2012 Jan 26;55(4):996–1000. doi: 10.1007/s00125-012-2450-3 (PMC3296014; doi:10.1007/s00125-012-2450-3), 2012-01-26
Supplement: 125_2012_2450_MOESM2_ESM.pdf [file 125_2012_2450_MOESM2_ESM.pdf]

**ESM Table 1:** A summary of the number of families genotyped and the number of families analysed with at least both parents and one affected offspring genotyped for one or more of the 18 susceptibility loci discovered by Barrett *et al.* [1]. For further information about family collections see [www-gene.cimr.cam.ac.uk/todd/dna-refs.shtml](http://www-gene.cimr.cam.ac.uk/todd/dna-refs.shtml), [www.t1dgc.org](http://www.t1dgc.org) and Morahan *et al.* [2]. T1DGC – Type 1 Diabetes Genetics Consortium, DUK – Warren 1 Diabetes UK, HBDI – Human Biological Data Interchange, AP – Asia Pacific, EU – European, UK – United Kingdom, NA – North America.

| Family collection     | 5,427 families | 4,429 families of white European ancestry and providing one or more parent-child trios |                                                      |                                                                                                      |
|-----------------------|----------------|----------------------------------------------------------------------------------------|------------------------------------------------------|------------------------------------------------------------------------------------------------------|
|                       |                | Families analysed in Barrett <i>et al.</i><br>2,107 families<br>4,212 trios            | Additional families<br>2,322 families<br>2,801 trios | Parents in both Barrett <i>et al.</i> and additional families, but with different affected offspring |
| †DUK                  | 470            | 468                                                                                    | --                                                   | --                                                                                                   |
| *Yorkshire, UK        | 80             | --                                                                                     | 80                                                   | --                                                                                                   |
| *Northern Ireland, UK | 262            | --                                                                                     | 262                                                  | --                                                                                                   |
| *Finland              | 1,229          | --                                                                                     | 1,210                                                | --                                                                                                   |
| *Romania              | 423            | --                                                                                     | 359                                                  | --                                                                                                   |
| †HBDI                 | 335            | 324                                                                                    | 5                                                    | --                                                                                                   |
| †T1DGC-AP             | 277            | 117                                                                                    | 38                                                   | 5                                                                                                    |
| †T1DGC-EU             | 1,180          | 619                                                                                    | 134                                                  | 24                                                                                                   |
| †T1DGC-UK             | 154            | 54                                                                                     | 57                                                   | 3                                                                                                    |
| †T1DGC-NA             | 1,017          | 522                                                                                    | 177                                                  | 28                                                                                                   |

† Studies recruited affected sib-pair families. We note that the 262 families from Northern Ireland consisted of 244 simplex and 18 multiplex families, and the 1,229 families from Finland consisted of 1,132 simplex and 97 multiplex families.

\* Families available through Juvenile Diabetes Research Foundation/Wellcome Trust Diabetes and Inflammation Laboratory and collaborators (see Acknowledgements).

## References

- [1] Barrett JC, Clayton DG, Concannon P, et al. (2009) Genome-wide association study and meta-analysis find that over 40 loci affect risk of type 1 diabetes. *Nat Genet* 41: 703-707
- [2] Morahan G, Mehta M, James I, et al. (2011) Tests for genetic interactions in type 1 diabetes: linkage and stratification analyses of 4,422 affected sib-pairs. *Diabetes* 60: 1030-1040
