# Supplementary material for: Confirmation of novel type 1 diabetes risk loci in families
Source: PubMed Central journal article supplement — Diabetologia. 2012 Jan 26;55(4):996–1000. doi: 10.1007/s00125-012-2450-3 (PMC3296014; doi:10.1007/s00125-012-2450-3), 2012-01-26
Supplement: 125_2012_2450_MOESM3_ESM.pdf [file 125_2012_2450_MOESM3_ESM.pdf]

**ESM Table 2:** The power to replicate the 18 novel type 1 diabetes susceptibility loci discovered in Barrett *et al.* [1]. We assumed significance levels of 0.05 and  $2.8 \times 10^{-3}$  (0.05 alpha level corrected for 18 independent tests using the Bonferroni approach), minor allele frequency (MAF) in 10,335 British controls samples (7,181 subjects drawn from the British 1958 Birth Cohort ([www.cls.ioe.ac.uk/studies.asp?section=000100020003](http://www.cls.ioe.ac.uk/studies.asp?section=000100020003)) and 3,154 subjects drawn from the UK Blood Services Common Control Collection [2, 3]) and odds ratio (OR) for the minor allele from the case/control component of the replication samples [1].

| Region<br>Candidate gene<br>rsnumber<br>Alleles      | MAF<br>OR     | Power (%)                                           |                              |                                        |                              |
|------------------------------------------------------|---------------|-----------------------------------------------------|------------------------------|----------------------------------------|------------------------------|
|                                                      |               | Barrett <i>et al.</i><br>2,107 families 4,212 trios |                              | Combined<br>4,366 families 7,013 trios |                              |
|                                                      |               | Alpha = 0.05                                        | Alpha = $2.8 \times 10^{-3}$ | Alpha = 0.05                           | Alpha = $2.8 \times 10^{-3}$ |
| 1q32.1<br><i>IL10</i><br>rs3024505 C>T               | 0.17<br>0.84  | 98.4                                                | 87.0                         | 100.0                                  | 99.0                         |
| 4p15.2<br>rs10517086 G>A                             | 0.30<br>1.09  | 73.3                                                | 34.2                         | 91.5                                   | 63.4                         |
| 6q22.32<br><i>C6orf173</i><br>rs9388489 A>G          | 0.45<br>1.17  | 99.9                                                | 98.2                         | 100.0                                  | 100.0                        |
| 7p12.1<br><i>COBL</i><br>rs4948088 C>A               | 0.047<br>0.77 | 92.3                                                | 65.2                         | 99.2                                   | 91.6                         |
| 7p15.2<br><i>SKAP2</i><br>rs7804356 T>C              | 0.24<br>0.88  | 94.5                                                | 68.5                         | 99.4                                   | 93.2                         |
| 9p24.2<br><i>GLIS3</i><br>rs7020673 G>C              | 0.50<br>0.88  | 98.6                                                | 87.6                         | 100.0                                  | 99.1                         |
| 10q23.31<br><i>RNLS</i><br>rs10509540 T>C            | 0.29<br>0.75  | 100.0                                               | 100.0                        | 100.0                                  | 100.0                        |
| 12p13.31<br><i>CD69</i><br>rs4763879 G>A             | 0.37<br>1.09  | 77.4                                                | 39.0                         | 93.8                                   | 69.5                         |
| 14q24.1<br><i>ZFP36L1/C14orf181</i><br>rs1465788 G>A | 0.29<br>0.86  | 99.2                                                | 91.4                         | 100.0                                  | 99.6                         |

|                                               |               |      |      |       |       |
|-----------------------------------------------|---------------|------|------|-------|-------|
| 14q32.2<br><i>CI4orf64</i><br>rs4900384 A>G   | 0.29<br>1.09  | 72.4 | 33.2 | 90.9  | 62.1  |
| 16p11.2<br><i>IL27</i><br>rs4788084 G>A       | 0.42<br>0.86  | 99.8 | 96.5 | 100.0 | 99.9  |
| 16q23.1<br><i>CTRB2</i><br>rs7202877 T>G      | 0.096<br>1.28 | 99.9 | 97.6 | 100.0 | 100.0 |
| 17q12<br><i>GSDMB/ORMDL3</i><br>rs2290400 G>A | 0.50<br>0.87  | 99.5 | 93.6 | 100.0 | 99.8  |
| 17q21.2<br><i>CCR7</i><br>rs7221109 C>T       | 0.35<br>0.95  | 35.4 | 8.0  | 53.4  | 17.2  |
| 19q13.32<br><i>PRKD2</i><br>rs425105 A>G      | 0.16<br>0.86  | 94.0 | 70.0 | 99.5  | 93.9  |
| 20p13<br><i>SIRPG</i><br>rs2281808 C>T        | 0.36<br>0.90  | 90.3 | 60.7 | 98.8  | 88.8  |
| 22q12.2<br><i>HORMAD2</i><br>rs5753037 C>T    | 0.39<br>1.10  | 85.8 | 51.7 | 97.5  | 82.2  |
| Xq28<br><i>GAB3</i><br>rs2664170 A>G          | 0.32<br>1.16  | 99.5 | 93.9 | 100.0 | 99.8  |

## References

- [1] Barrett JC, Clayton DG, Concannon P, et al. (2009) Genome-wide association study and meta-analysis find that over 40 loci affect risk of type 1 diabetes. *Nat Genet* 41: 703-707
- [2] The Wellcome Trust Case Control Consortium (2007) Genome-wide association study of 14,000 cases of seven common diseases and 3,000 shared controls. *Nature* 447: 661-678
- [3] Burton PR, Clayton DG, Cardon LR, et al. (2007) Association scan of 14,500 nonsynonymous SNPs in four diseases identifies autoimmunity variants. *Nat Genet* 39: 1329-1337
