# Supplementary material for: Confirmation of novel type 1 diabetes risk loci in families
Source: PubMed Central journal article supplement — Diabetologia. 2012 Jan 26;55(4):996–1000. doi: 10.1007/s00125-012-2450-3 (PMC3296014; doi:10.1007/s00125-012-2450-3), 2012-01-26
Supplement: 125_2012_2450_MOESM4_ESM.pdf [file 125_2012_2450_MOESM4_ESM.pdf]

**ESM Table 3:** Tests of heterogeneity of genotype frequencies and disease association across family collections (listed in ESM Table 1).

| Region<br>Candidate gene<br>rsnumber<br>Alleles      | Genotype frequency<br>heterogeneity tests | Disease association<br>heterogeneity tests |
|------------------------------------------------------|-------------------------------------------|--------------------------------------------|
| 1q32.1<br><i>IL10</i><br>rs3024505 C>T               | 0.25                                      | 0.42                                       |
| 4p15.2<br>rs10517086 G>A                             | 0.12                                      | 0.36                                       |
| 6q22.32<br><i>C6orf173</i><br>rs9388489 A>G          | $6.9 \times 10^{-4}$                      | 0.82                                       |
| 7p12.1<br><i>COBL</i><br>rs4948088 C>A               | $5.6 \times 10^{-8}$                      | 0.14                                       |
| 7p15.2<br><i>SKAP2</i><br>rs7804356 T>C              | $4.3 \times 10^{-8}$                      | 0.084                                      |
| 9p24.2<br><i>GLIS3</i><br>rs7020673 G>C              | 0.025                                     | 0.61                                       |
| 10q23.31<br><i>RNLS</i><br>rs10509540 T>C            | 0.071                                     | 0.015                                      |
| 12p13.31<br><i>CD69</i><br>rs4763879 G>A             | $8.0 \times 10^{-3}$                      | 0.57                                       |
| 14q24.1<br><i>ZFP36L1/C14orf181</i><br>rs1465788 G>A | $4.0 \times 10^{-15}$                     | 0.010                                      |
| 14q32.2<br><i>C14orf64</i><br>rs4900384 A>G          | $4.4 \times 10^{-46}$                     | 0.30                                       |
| 16p11.2<br><i>IL27</i><br>rs4788084 G>A              | $1.3 \times 10^{-14}$                     | 0.57                                       |
| 16q23.1<br><i>CTRB2</i><br>rs7202877 T>G             | $5.6 \times 10^{-8}$                      | 0.026                                      |
| 17q12<br><i>GSDMB/ORMDL3</i><br>rs2290400 G>A        | $1.3 \times 10^{-11}$                     | 0.34                                       |
| 17q21.2<br><i>CCR7</i>                               | $1.9 \times 10^{-14}$                     | 0.39                                       |

|                                            |                       |       |
|--------------------------------------------|-----------------------|-------|
| rs7221109 C>T                              |                       |       |
| 19q13.32<br><i>PRKD2</i><br>rs425105 A>G   | 0.51                  | 0.57  |
| 20p13<br><i>SIRPG</i><br>rs2281808 C>T     | $3.1 \times 10^{-14}$ | 0.91  |
| 22q12.2<br><i>HORMAD2</i><br>rs5753037 C>T | $5.4 \times 10^{-9}$  | 0.43  |
| Xq28<br><i>GAB3</i><br>rs2664170 A>G       | $4.4 \times 10^{-5}$  | 0.31* |

\*Only females analysed, only transmissions from the mother were considered for the chromosome X disease association heterogeneity test.
