# Supplementary material for: Confirmation of novel type 1 diabetes risk loci in families
Source: PubMed Central journal article supplement — Diabetologia. 2012 Jan 26;55(4):996–1000. doi: 10.1007/s00125-012-2450-3 (PMC3296014; doi:10.1007/s00125-012-2450-3), 2012-01-26
Supplement: 125_2012_2450_MOESM5_ESM.pdf [file 125_2012_2450_MOESM5_ESM.pdf]

**ESM Table 4:** Tests for parent-of-origin and imprinting effects in type 1 diabetes families.

Note, only families with discordant parental and maternal genotypes were informative and could be analysed for parent-of-origin effects.

| Region<br>Candidate gene<br>rsnumber<br>Alleles      | Number of informative<br>families | Maternal Genotype, <i>P</i> -<br>value | Imprinting, <i>P</i> -value |
|------------------------------------------------------|-----------------------------------|----------------------------------------|-----------------------------|
| 1q32.1<br><i>IL10</i><br>rs3024505 C>T               | 1,585                             | 0.13                                   | 0.35                        |
| 4p15.2<br>rs10517086 G>A                             | 2,256                             | 0.73                                   | 0.16                        |
| 6q22.32<br><i>C6orf173</i><br>rs9388489 A>G          | 2,431                             | 0.64                                   | 0.47                        |
| 7p12.1<br><i>COBL</i><br>rs4948088 C>A               | 435                               | 1.1x10 <sup>-3</sup>                   | 0.12                        |
| 7p15.2<br><i>SKAP2</i><br>rs7804356 T>C              | 2,015                             | 0.44                                   | 0.054                       |
| 9p24.2<br><i>GLIS3</i><br>rs7020673 G>C              | 2,375                             | 0.71                                   | 0.43                        |
| 10q23.31<br><i>RNLS</i><br>rs10509540 T>C            | 2,058                             | 0.55                                   | 0.23                        |
| 12p13.31<br><i>CD69</i><br>rs4763879 G>A             | 2,245                             | 0.16                                   | 0.72                        |
| 14q24.1<br><i>ZFP36L1/C14orf181</i><br>rs1465788 G>A | 2,180                             | 0.99                                   | 0.63                        |
| 14q32.2<br><i>C14orf64</i><br>rs4900384 A>G          | 2,327                             | 0.95                                   | 0.94                        |
| 16p11.2<br><i>IL27</i><br>rs4788084 G>A              | 2,411                             | 0.017                                  | 0.28                        |
| 16q23.1<br><i>CTRB2</i><br>rs7202877 T>G             | 1,377                             | 0.33                                   | 0.67                        |
| 17q12<br><i>GSDMB/ORMDL3</i><br>rs2290400 G>A        | 2,444                             | 0.68                                   | 0.74                        |

|                                            |       |      |      |
|--------------------------------------------|-------|------|------|
| 17q21.2<br><i>CCR7</i><br>rs7221109 C>T    | 2,431 | 0.32 | 0.30 |
| 19q13.32<br><i>PRKD2</i><br>rs425105 A>G   | 1,577 | 0.19 | 0.77 |
| 20p13<br><i>SIRPG</i><br>rs2281808 C>T     | 2,327 | 0.64 | 0.42 |
| 22q12.2<br><i>HORMAD2</i><br>rs5753037 C>T | 2,361 | 0.14 | 0.28 |
